# Supplementary material
Source: PubMed Central journal article supplement (PMC4243038)

Figure S1

A

| Samples               | replicates | total reads | uniquely mapped reads | uniquely mapped rate |
|-----------------------|------------|-------------|-----------------------|----------------------|
| Donor                 | 1          | 4.12E+07    | 3.21E+07              | 0.778                |
|                       | 2          | 4.03E+07    | 3.18E+07              | 0.789                |
| IVF 1-Cell            | 1          | 7.68E+07    | 5.43E+07              | 0.708                |
|                       | 2          | 7.14E+07    | 5.05E+07              | 0.707                |
| SCNT 1-Cell           | 1          | 7.47E+07    | 5.24E+07              | 0.702                |
|                       | 2          | 7.15E+07    | 5.00E+07              | 0.699                |
| IVF 2-Cell            | 1          | 6.40E+07    | 4.23E+07              | 0.661                |
|                       | 2          | 6.55E+07    | 4.31E+07              | 0.658                |
| SCNT 2-Cell           | 1          | 6.27E+07    | 4.42E+07              | 0.705                |
|                       | 2          | 6.65E+07    | 4.73E+07              | 0.711                |
| SCNT 2-Cell Kdm4d WT  | 1          | 4.18E+07    | 2.76E+07              | 0.660                |
|                       | 2          | 3.36E+07    | 2.26E+07              | 0.672                |
| SCNT 2-Cell Kdm4d MUT | 1          | 3.91E+07    | 2.51E+07              | 0.642                |
|                       | 2          | 3.82E+07    | 2.70E+07              | 0.707                |

B

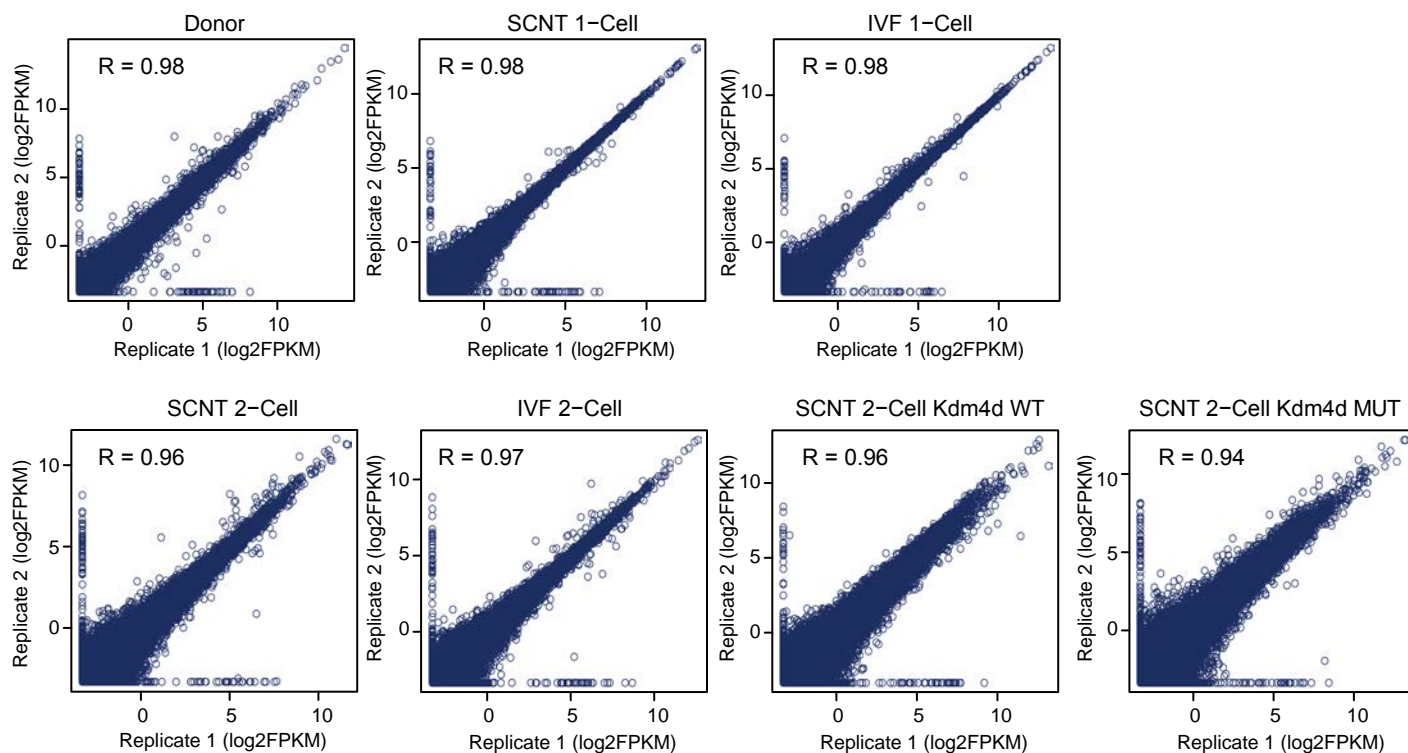

Supplement: NIHMS634073-supplement-1.pdf [file NIHMS634073-supplement-1.pdf]
