# Supplementary material
Source: PubMed Central journal article supplement (PMC4243038)

Figure S2

A

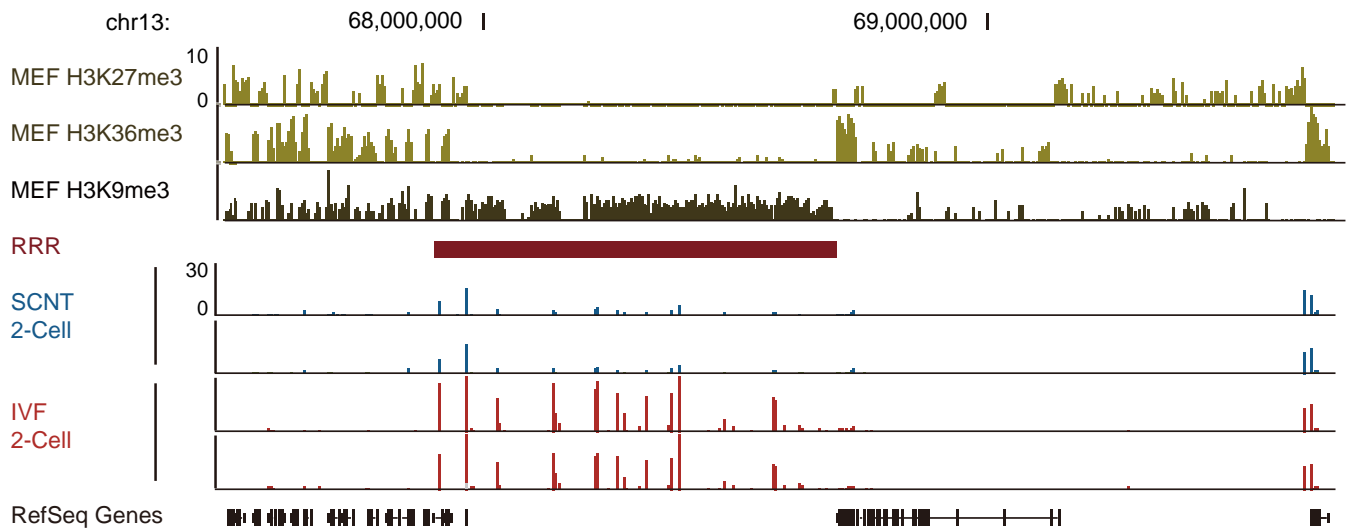

B

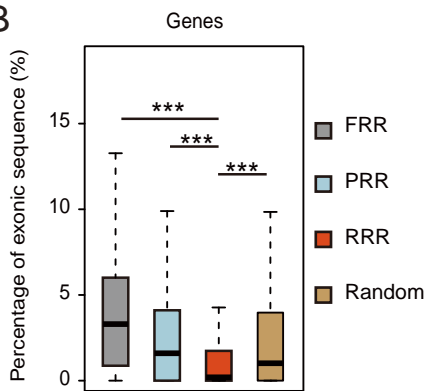

C

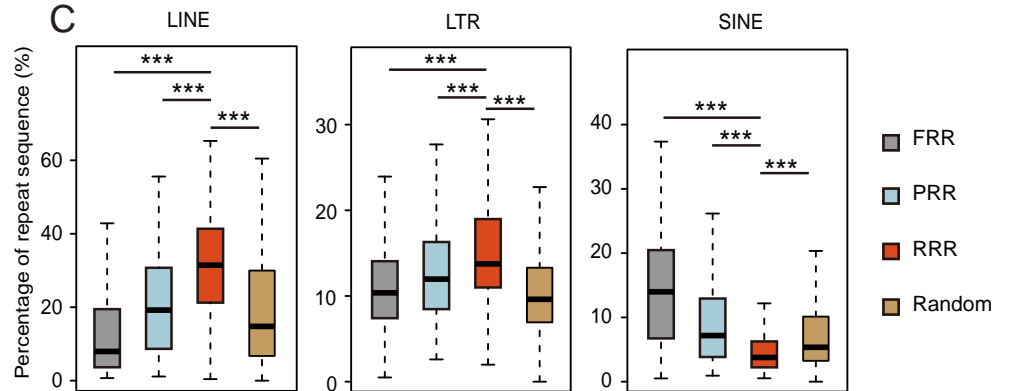

D

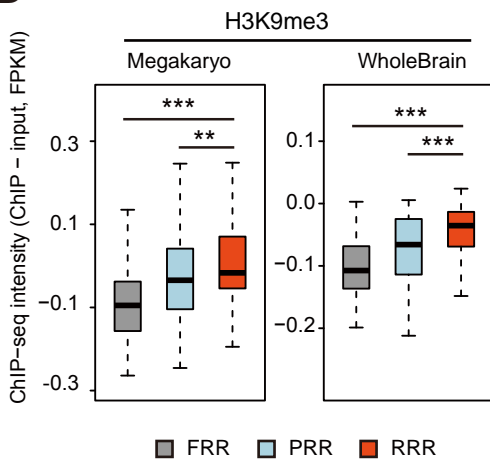

E

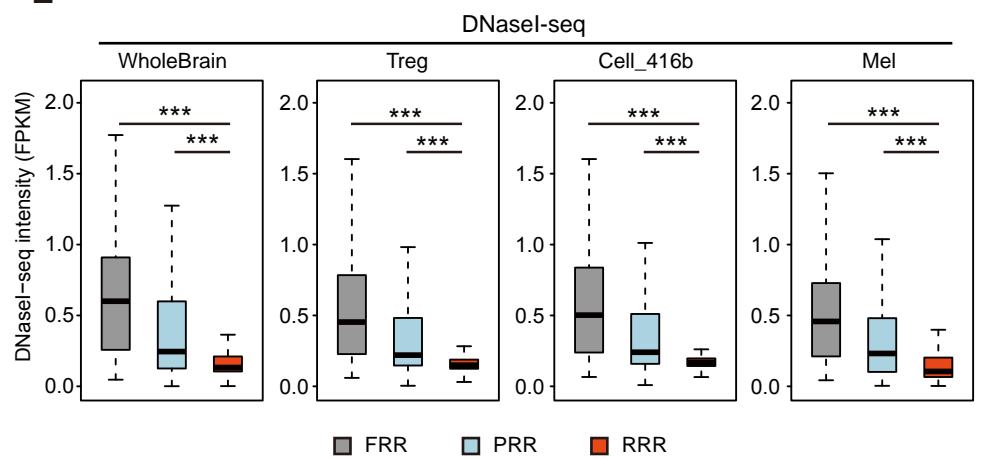

Supplement: NIHMS634073-supplement-2.pdf [file NIHMS634073-supplement-2.pdf]

Figure S3

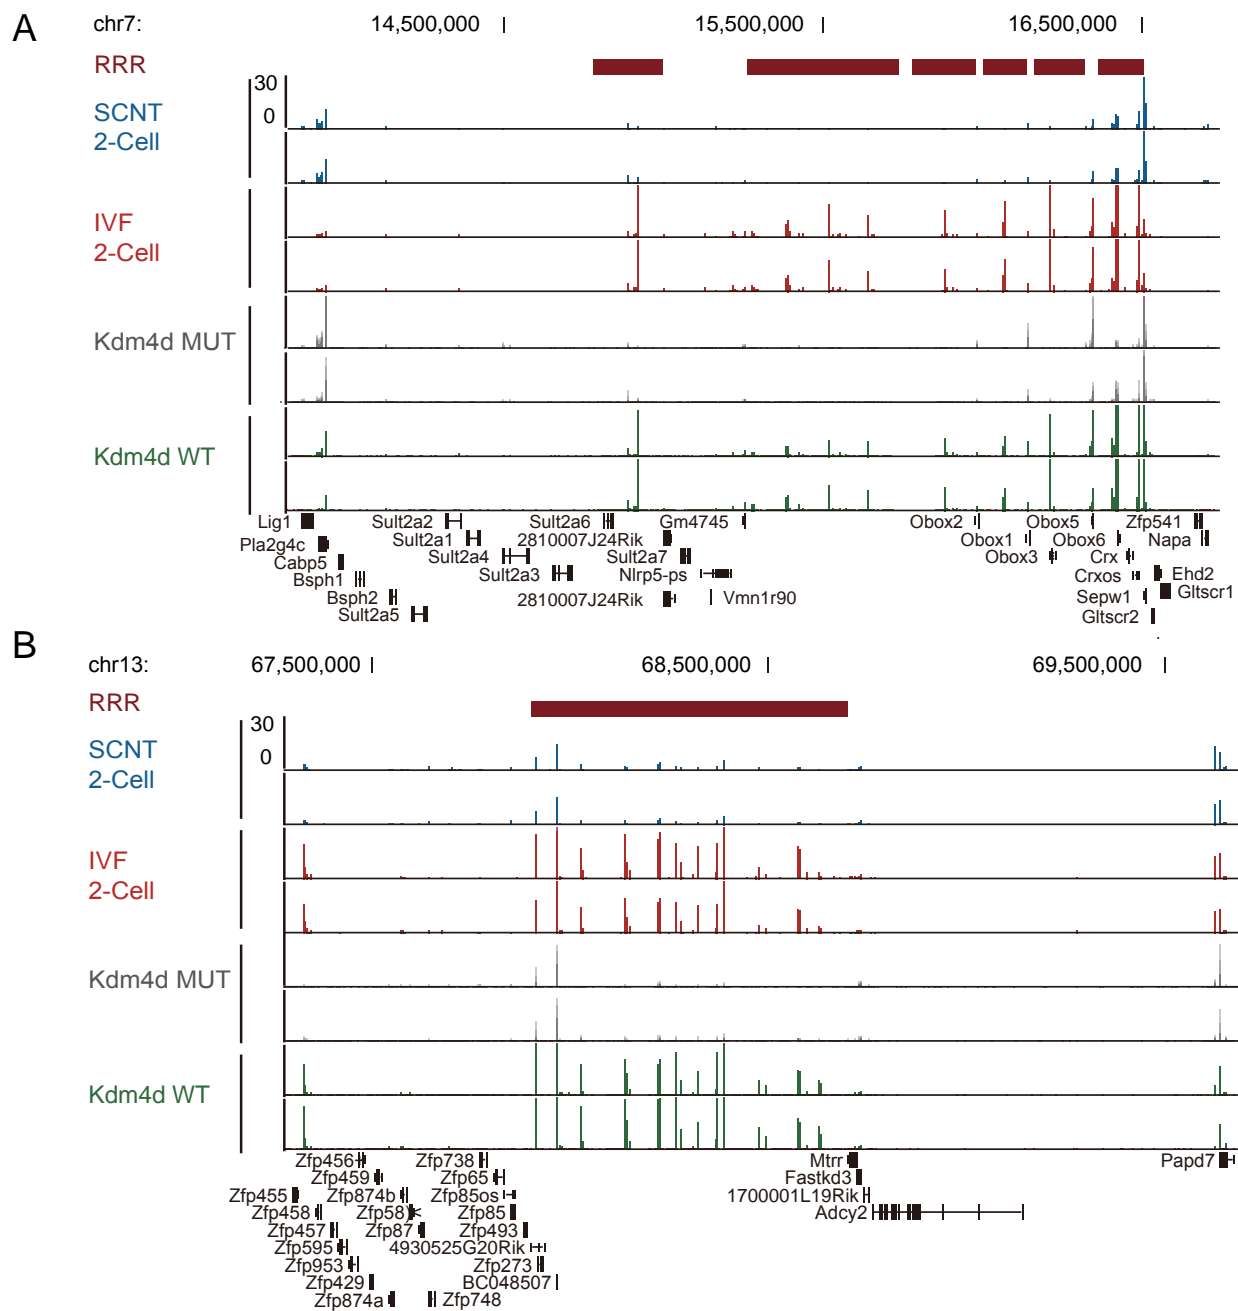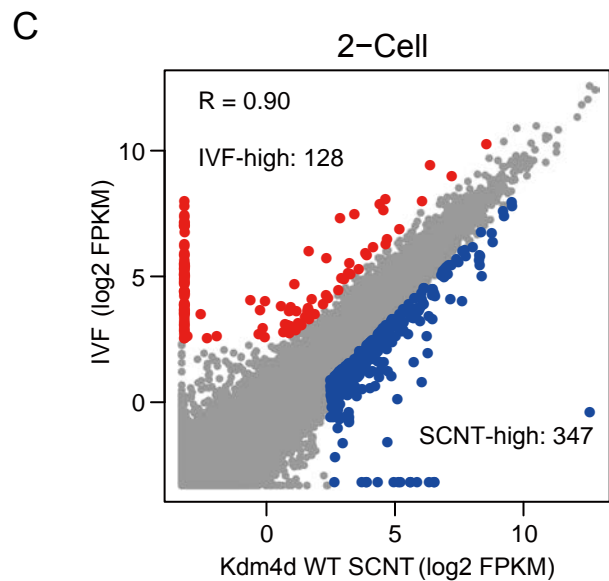

Supplement: NIHMS634073-supplement-3.pdf [file NIHMS634073-supplement-3.pdf]

Figure S4

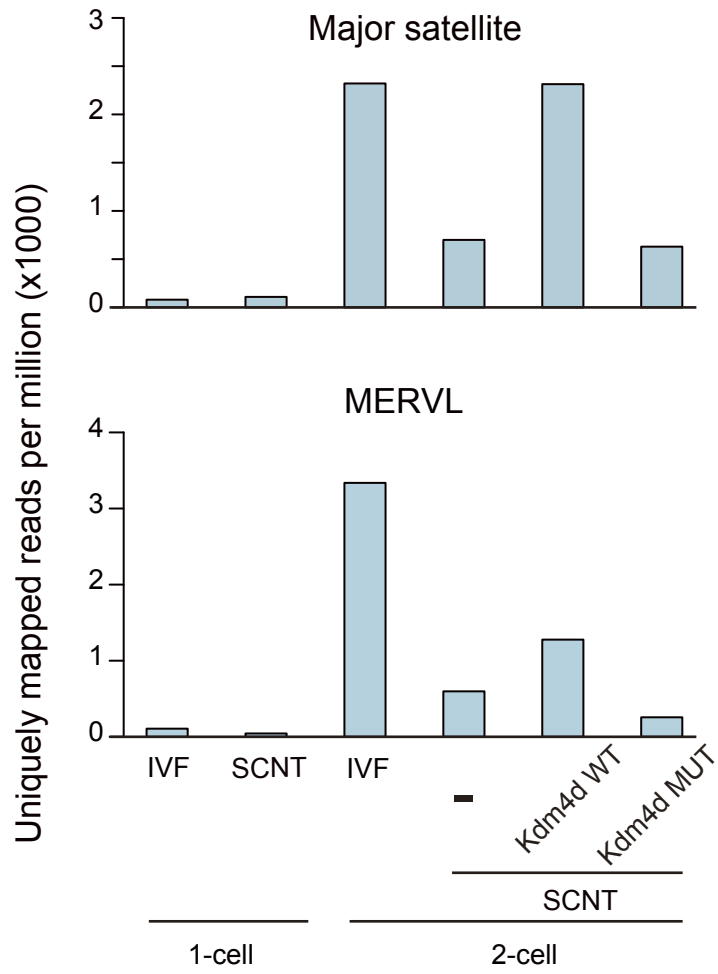

Supplement: NIHMS634073-supplement-4.pdf [file NIHMS634073-supplement-4.pdf]

Figure S5

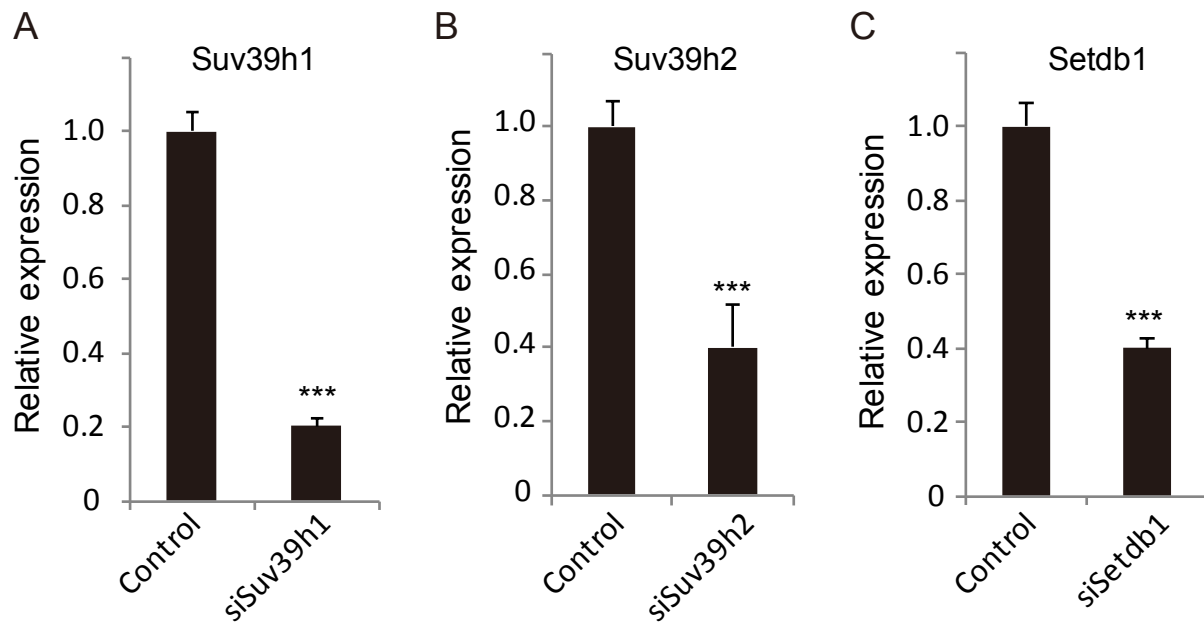

Supplement: NIHMS634073-supplement-5.pdf [file NIHMS634073-supplement-5.pdf]
